# Supplementary material
Source: PubMed Central journal article supplement (PMC5848210)
Supplement: NIHMS947943-supplement-ESI.pdf [file NIHMS947943-supplement-ESI.pdf]

**Supporting information:**

**Quantitative Differentiation of Cell Surface-Bound and Internalized Cationic Gold Nanoparticles Using Mass Spectrometry**

Singyuk Hou,<sup>†</sup> Kristen N. Sikora,<sup>†</sup> Rui Tang, Yuanchang Liu, Yi-Wei Lee, Sung Tae

Kim, Ziwen Jiang, Richard W. Vachet\* and Vincent M. Rotello\*

<sup>†</sup> S. Hou and K. N. Sikora contributed equally to this work.

Department of Chemistry, University of Massachusetts Amherst, 710 North Pleasant Street, Amherst,  
Massachusetts, 01003, USA

\*[rwwachet@chem.umass.edu](mailto:rwwachet@chem.umass.edu) (R.W.V.), [rotello@chem.umass.edu](mailto:rotello@chem.umass.edu) (V.M.R.)

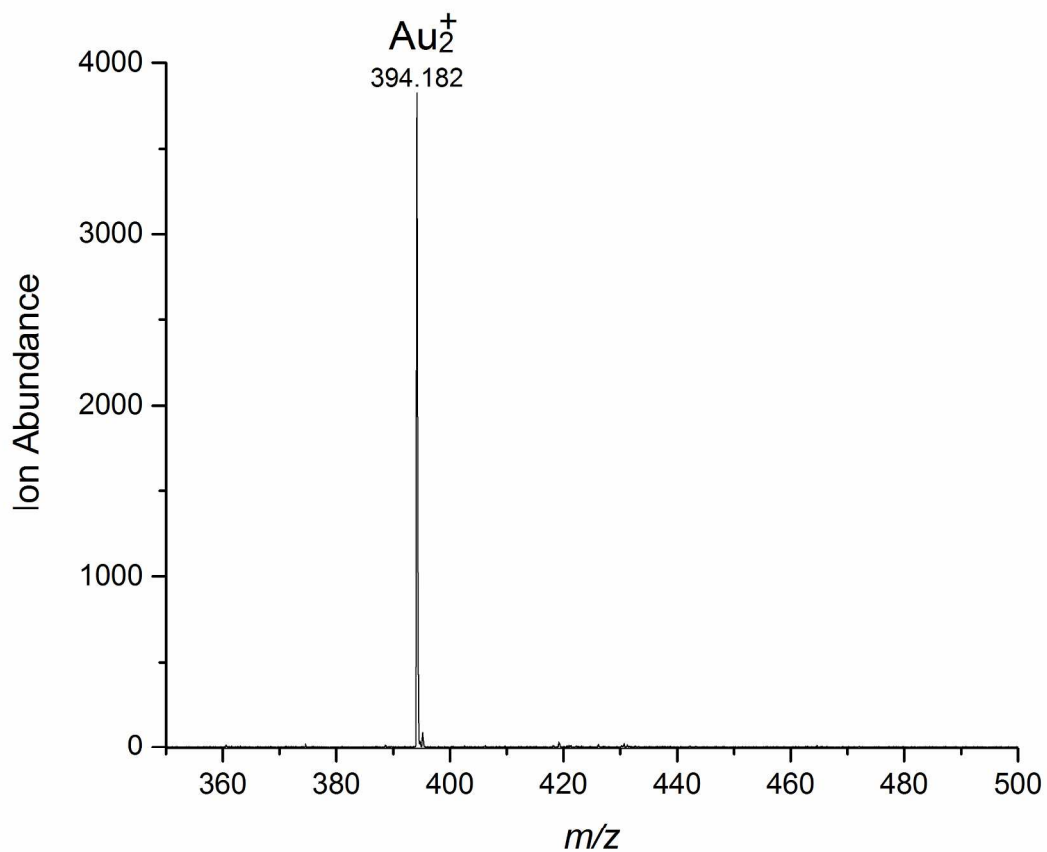

**Figure S1. LDI-MS detection of AuNPs on plain slide after washing steps, 250 nM AuNP 1 media solution was incubated on poly-lysine coated glass slide for 30 minutes at 37 °C. After the incubation, the AuNP 1 solution was removed and the glass slide was washed with PBS for 5 times, AuNP 2 was then incubated for 30 minutes under the same condition and washed with PBS for one time.**

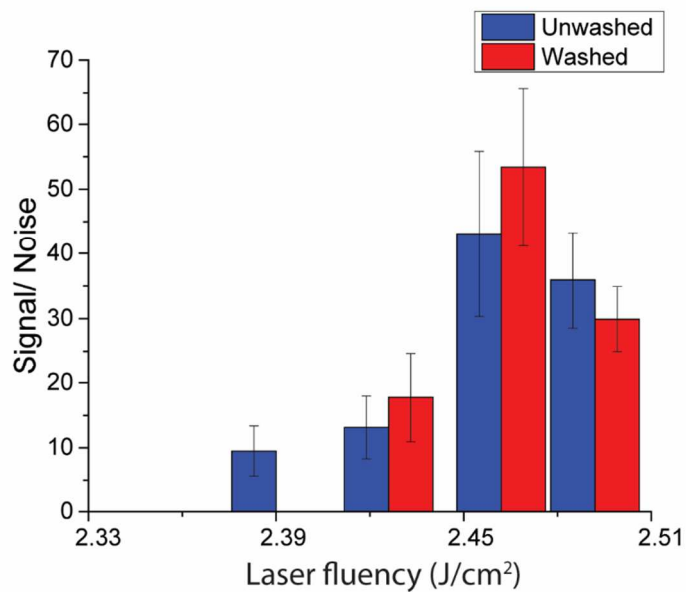

**Figure S2. LDI-MS of AuNP 2 on cell monolayers before and after washing. 250 nM AuNP 2 was incubated with the cell monolayer for 60 minutes in serum free media at 37 °C. After incubation, the cell monolayer was either washed four times (washed) or one time (unwashed) before LDI-MS analysis.**

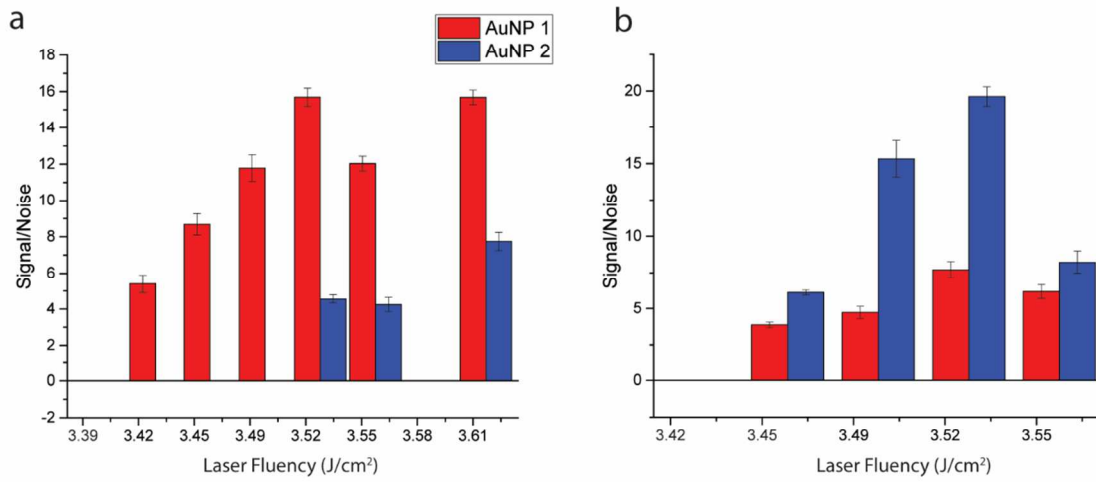

**Figure S3. a) LDI-MS of HeLa cell monolayer after sequential incubation by AuNP 2 and AuNP 1. b) LDI-MS of HeLa cells monolayers treated with 3mg/ml NaN<sub>3</sub> and 50 nM 2-deoxyglucose in DMEM for 30 minute prior to sequential AuNP incubation.**

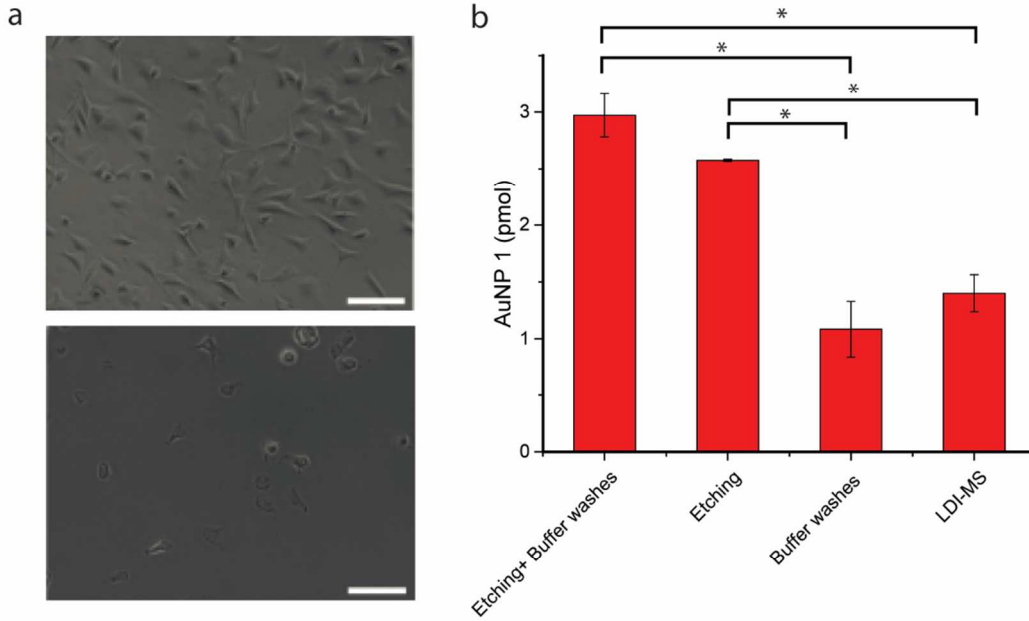

**Figure S4. a) Microscopic image of HeLa cells not etched (up) and etched (down) by I<sub>2</sub>/KI solution. Scale bars: 100μm. b) Comparisons of removal of surface-bound AuNPs via etching and buffer washing measured by ICP-MS. LDI-MS measurement of cell-surface adhered AuNP was added for further comparison. All the experiments were done with HeLa cells incubated with AuNP 1 for 30 minutes. The gold amount measured by ICP-MS in the etched and non-etched samples were converted to AuNP amount through division by 48.62 ng gold/ pmol AuNP. One way-ANOVA (P<0.05) was performed, n=3, all error bars represent standard deviation. Stars above the bars indicate significance, whereas no stars suggest not significantly different.**

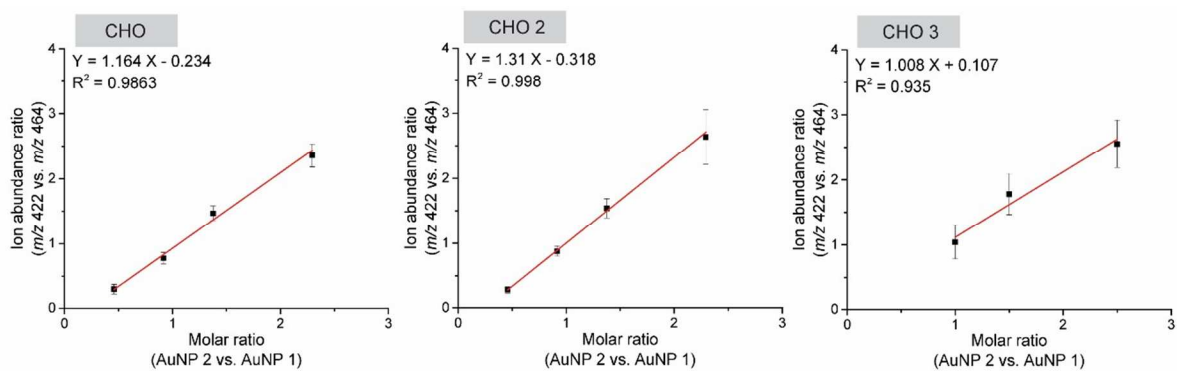

**Figure S5. LDI-MS calibration curves for AuNP 2 on the cell surface. HeLa, CHO, CHO 2 and CHO 3 cells were cultured on ITO-glass slide. Increasing concentrations of AuNP 2 were mixed with AuNP 1 (internal standard) and incubated with cells as described in the text. Cells on the glass slide were detected using 38.6  $\mu$ J to only detect AuNPs on cell surface. Molecular ions of both AuNPs were plotted against molar ratios.**

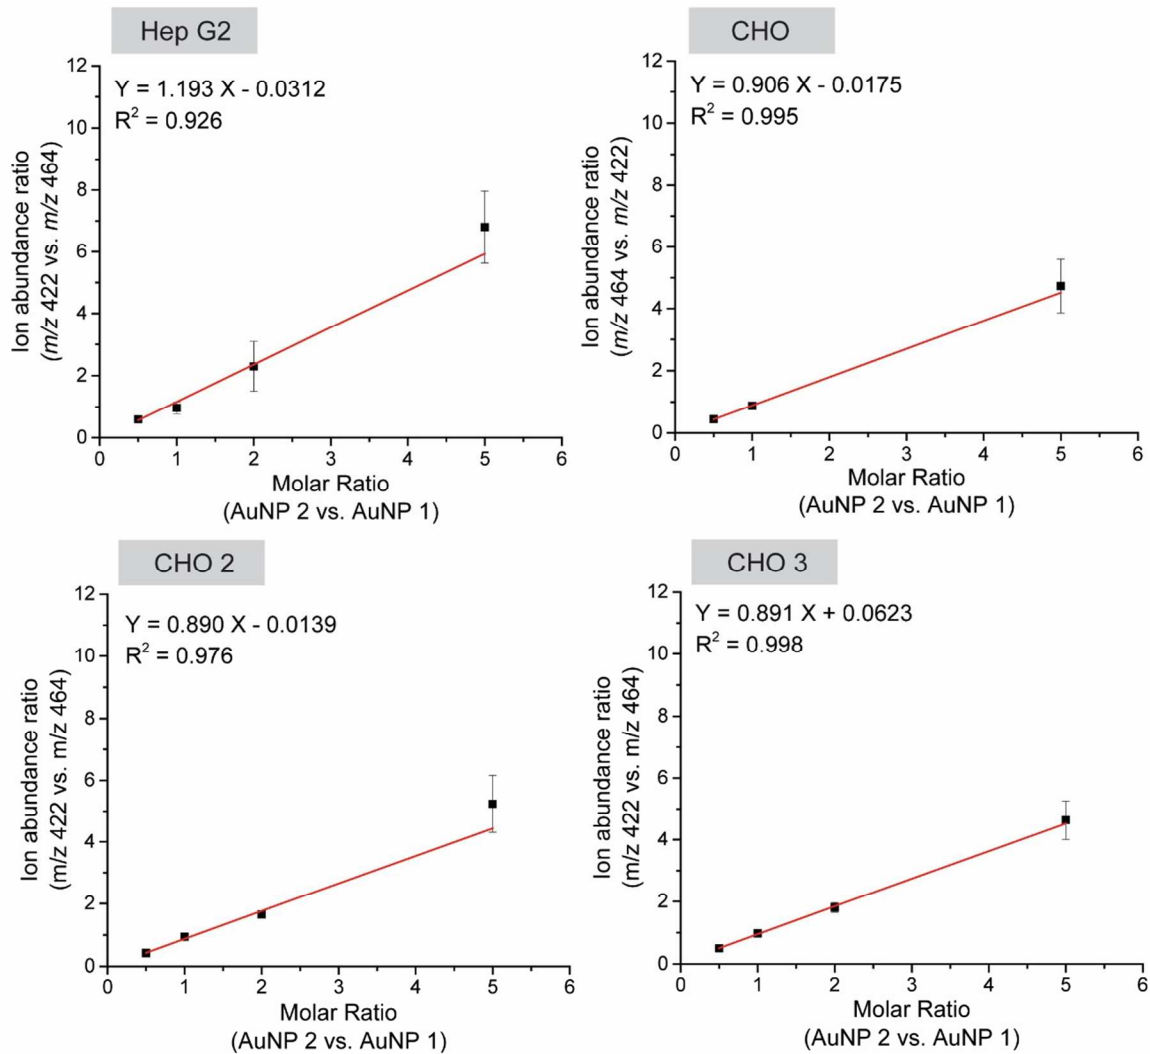

**Figure S6.** LDI-MS calibration curves for AuNP 2 in cell lysate. Increasing concentrations of AuNP 2 were mixed with AuNP 1 (internal standard) and spiked into cell lysate of HeLa, Hep G2, CHO, CHO 2 and CHO 3 cells. After centrifugation, the resulting pellets were deposited on a stainless steel target and analyzed with LDI-MS. Molecular ions of both AuNPs were plotted against molar ratios.

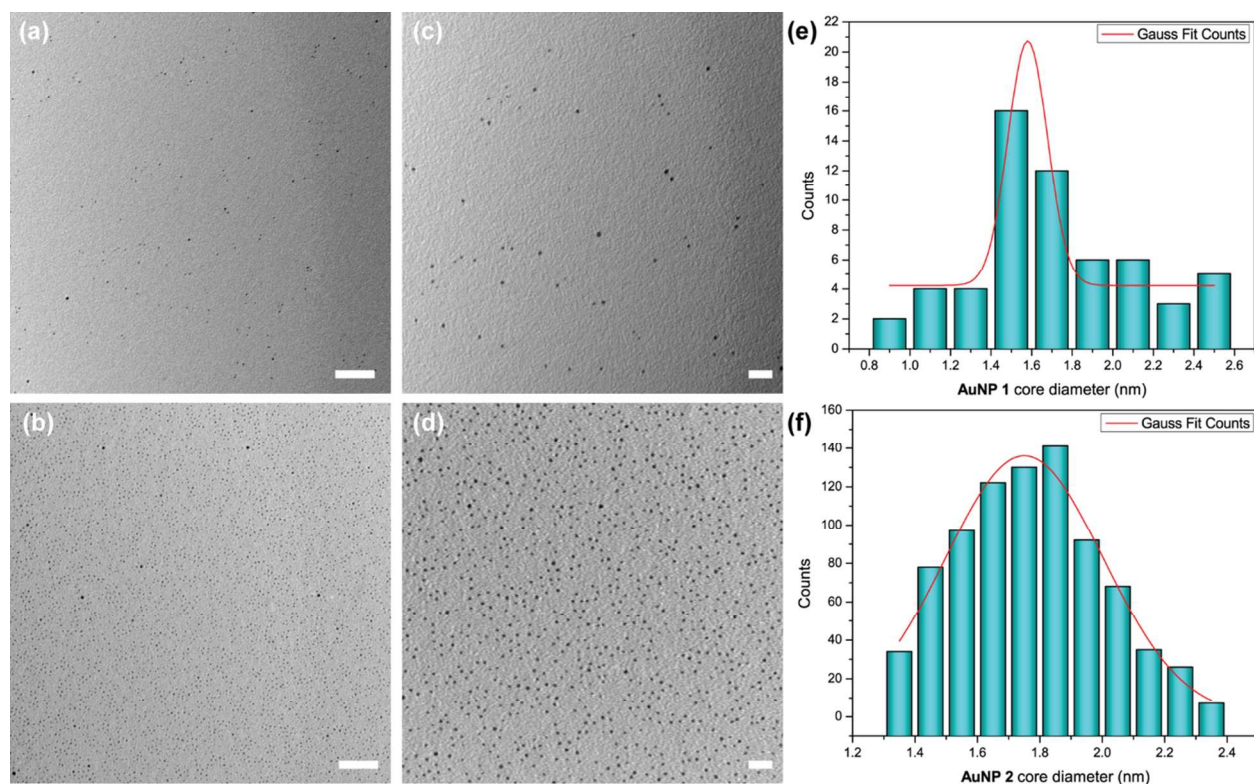

Figure S7. (a) ~ (d) TEM images of AuNPs: (a) & (c) AuNP 1; (b) & (d) AuNP 2. The white scale bar is 50 nm in (a) & (d) and 10 nm in (c) & (d). (e), (f) Core size distribution analysis for AuNPs corresponding to (c), (d), respectively: (e) AuNP 1:  $(1.6 \pm 0.1)$  nm, and (f) AuNP 2:  $(1.7 \pm 0.2)$  nm.

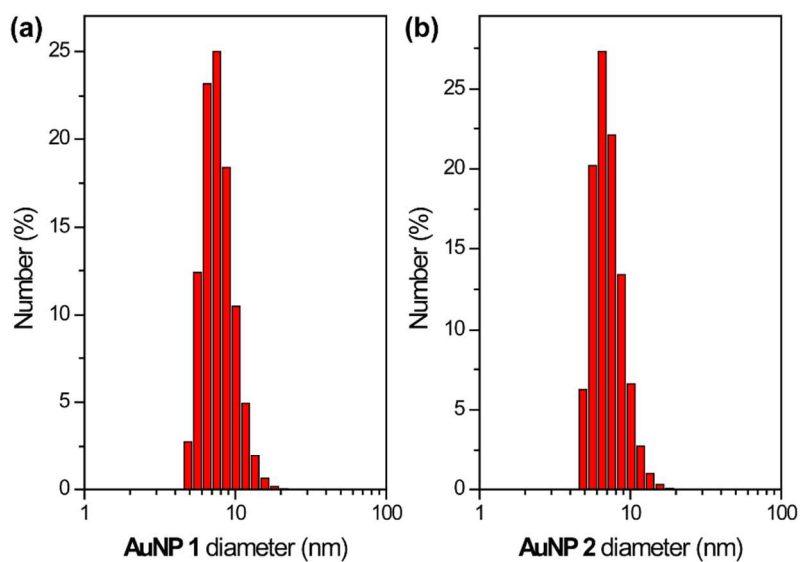

Figure S8. DLS histogram of AuNPs, demonstrating the hydrodynamic diameter distribution of nanoparticles: (a) AuNP 1 and (b) AuNP 2.



## Calculation of absolute quantity of total, internalized and cell surface-bound AuNP 2 by coupling LDI-MS and ICP-MS

After incubation and addition of the internal standard (AuNP 1), the cells are lysed for ICP-MS detection. The gold amount measured from the sample is denoted by  $X$  (ng).  $X$  arises from contributions from the gold amounts of AuNP 2 ( $X$  (AuNP 2) total) and AuNP 1 ( $X$  (AuNP 1)). The LDI-MS measured molar ratio between AuNP 2 and AuNP 1 is denoted by  $Y$ .  $Y_{total}$  represents the molar ratio of the total amounts of AuNP 2 to AuNP 1. With equation (1), the absolute amount of total AuNP 2 with cells can be calculated.

Equation (2) describes the absolute amount of AuNP 2 on the cell surface.  $Y_{surface}$  represents the molar ratio of cell surface-bound AuNP 2 to AuNP 1. By subtracting AuNP 2 on cell surface from total amount of AuNP 2 in equation (3), absolute amount for internalization can be determined.

$$\begin{cases} X(\text{AuNP 2})_{total} = X - X(\text{AuNP 1}) \\ \frac{X(\text{AuNP 2})_{total}}{X(\text{AuNP 1})} = Y_{total} \end{cases} \quad (1)$$

$$X(\text{AuNP 2})_{surface} = \frac{Y_{surface}}{Y_{total}} \times X(\text{AuNP 2})_{total} \quad (2)$$

$$X(\text{AuNP 2})_{internalization} = X(\text{AuNP 2})_{total} - X(\text{AuNP 2})_{surface} \quad (3)$$
